# Supplementary material
Source: publisher site journal article supplement (https://www.kjim.org/upload/media/kjim-2024-034-Supplementary-Table-3.pdf)
Supplement: Supplementary file 1 [file kjim-2024-034-Supplementary-Table-3.pdf]

**Supplementary Table 3. Data timepoints for each objective**

| Objectives                                                                                             | Data timepoints |                        |                         |                         |                                          |
|--------------------------------------------------------------------------------------------------------|-----------------|------------------------|-------------------------|-------------------------|------------------------------------------|
|                                                                                                        | Baseline        | 6-months <sup>a)</sup> | 12-months <sup>a)</sup> | 24-months <sup>a)</sup> | Any visits after 12-months <sup>a)</sup> |
| Patient demographics and baseline characteristics                                                      | x               |                        |                         |                         |                                          |
| Patient demographics, stratified by BEC                                                                | x               |                        |                         |                         |                                          |
| Patterns in BEC, stratified by clinical characteristics                                                | x               | x                      | x                       |                         |                                          |
| Patterns in BEC (impact of BEC on the number of moderate and severe exacerbations following enrolment) | x               | x                      | x                       | x                       | x                                        |
| The stability of BEC measurements over time                                                            | x               | x                      | x                       | x                       | x                                        |
| Quality of life (as evaluated by PROs)                                                                 | x               |                        |                         |                         |                                          |
| Treatment patterns among the COPD cohort                                                               | x               | x                      | x                       |                         |                                          |

BEC, blood eosinophil count; PRO, patient-reported outcome; COPD, chronic obstructive pulmonary disorder.

<sup>a)</sup>There is a  $\pm$  3-month time window for each visit.
